# Supplementary material for: Predicting the replicability of social science lab experiments
Source: PLOS journal article supplement (doi:10.1371/journal.pone.0225826), 2019-12-05
Supplement: S2 (10.1371/journal.pone.0225826.s002) [file journal.pone.0225826.s002.pdf]

Table 2: Summary Statistics (continuous variables)

| Variable               | Min.    | Median  | Mean    | Max.     | NA's  |
|------------------------|---------|---------|---------|----------|-------|
| author_citations_avg.o | 40.00   | 1733.67 | 4210.25 | 44075.00 | 0.00  |
| author_citations_avg.r | 18.50   | 361.33  | 754.66  | 6063.00  | 0.00  |
| author_citations_max.o | 54.00   | 3266.00 | 8152.51 | 45135.00 | 0.00  |
| author_citations_max.r | 35.00   | 622.00  | 3320.81 | 18185.00 | 0.00  |
| authors_male.o         | 0.00    | 0.67    | 0.71    | 1.00     | 0.00  |
| authors_male.r         | 0.00    | 0.52    | 0.56    | 1.00     | 0.00  |
| citations              | 6.00    | 72.00   | 264.35  | 13010.00 | 0.00  |
| effect_size.o          | 0.10    | 0.38    | 0.41    | 0.86     | 0.00  |
| effect_size.r          | -0.45   | 0.15    | 0.22    | 0.92     | 0.00  |
| endprice               | 0.13    | 0.68    | 0.63    | 0.94     | 76.00 |
| es_80power             | 0.04    | 0.28    | 0.30    | 0.95     | 0.00  |
| length                 | 1.00    | 10.00   | 13.17   | 45.00    | 0.00  |
| n_authors.o            | 1.00    | 3.00    | 2.83    | 9.00     | 0.00  |
| n_authors.r            | 1.00    | 2.00    | 12.00   | 64.00    | 0.00  |
| n_planned.r            | 5.00    | 100.00  | 922.87  | 6336.00  | 0.00  |
| n.o                    | 7.00    | 72.00   | 92.96   | 660.00   | 0.00  |
| n.r                    | 7.00    | 124.00  | 899.14  | 6336.00  | 0.00  |
| p_value.o              | 0.00    | 0.01    | 0.01    | 0.10     | 0.00  |
| p_value.r              | 0.00    | 0.14    | 0.26    | 0.98     | 0.00  |
| power_planned.r        | 0.07    | 0.93    | 0.86    | 1.00     | 0.00  |
| power.o                | 0.29    | 0.77    | 0.76    | 1.00     | 0.00  |
| power.r                | 0.05    | 0.30    | 0.48    | 1.00     | 0.00  |
| pub_year               | 1973.00 | 2008.00 | 2007.16 | 2015.00  | 0.00  |
| relative_es            | -0.90   | 0.43    | 0.49    | 2.38     | 0.00  |
| trading_volume         | 168.96  | 777.51  | 982.58  | 2849.37  | 75.00 |
| transactions           | 28.00   | 60.00   | 74.96   | 193.00   | 75.00 |

Table 3: Summary Statistics (binary variables)

| Variable      | 0   | 1   |
|---------------|-----|-----|
| online.o      | 129 | 2   |
| online.r      | 122 | 9   |
| replicated    | 75  | 56  |
| same_country  | 67  | 64  |
| same_language | 41  | 90  |
| same_online   | 9   | 122 |
| same_subjects | 18  | 113 |
| us_lab.o      | 45  | 86  |
| us_lab.r      | 53  | 78  |

Table 4: Summary Statistics: (discipline)

| Freq      |    |
|-----------|----|
| Cognitive | 49 |
| Economics | 18 |
| Social    | 64 |

Table 5: Summary Statistics: (effect\_type)

| Freq        |    |
|-------------|----|
| correlation | 6  |
| interaction | 41 |
| main effect | 84 |

Table 6: Summary Statistics: (experiment\_country)

| Freq           | (o) | (r) |
|----------------|-----|-----|
| Australia      | 2   | 1   |
| Austria        | 1   | 6   |
| Belgium        | 1   | 0   |
| Canada         | 4   | 3   |
| France         | 4   | 0   |
| Germany        | 10  | 16  |
| Hong Kong      | 0   | 1   |
| Israel         | 4   | 1   |
| Italy          | 2   | 3   |
| Netherlands    | 4   | 8   |
| Poland         | 1   | 0   |
| Singapore      | 0   | 5   |
| Spain          | 1   | 0   |
| Sweden         | 0   | 1   |
| Switzerland    | 2   | 0   |
| United Kingdom | 9   | 7   |
| United States  | 86  | 78  |
| Uruguay        | 0   | 1   |

Table 7: Summary Statistics: (`experiment_language`)

| Freq    | (o) | (r) |
|---------|-----|-----|
| Arabic  | 1   | 1   |
| Dutch   | 5   | 7   |
| English | 101 | 96  |
| France  | 1   | 0   |
| French  | 3   | 0   |
| German  | 13  | 23  |
| Hebrew  | 3   | 0   |
| Italian | 2   | 3   |
| Polish  | 1   | 0   |
| Spanish | 1   | 1   |

Table 8: Summary Statistics: (`compensation`)

| Freq    | (o) | (r) |
|---------|-----|-----|
| cash    | 47  | 52  |
| credit  | 57  | 58  |
| mixed   | 18  | 15  |
| nothing | 9   | 6   |

Table 9: Summary Statistics: (`subjects`)

| Freq      | (o) | (r) |
|-----------|-----|-----|
| anyone    | 9   | 6   |
| community | 8   | 8   |
| online    | 0   | 4   |
| students  | 114 | 113 |

Table 10: Summary Statistics: (`project`)

| Freq |    |
|------|----|
| ee   | 18 |
| m11  | 13 |
| m13  | 10 |
| rpp  | 90 |

Table 11: Summary Statistics: (`seniority`)

| Freq                | (o) | (r) |
|---------------------|-----|-----|
| Assistant           | 0   | 14  |
| Assistant Professor | 2   | 22  |
| Associate Professor | 11  | 24  |
| Professor           | 113 | 57  |
| Researcher          | 5   | 14  |
